# Supplementary material for: Effects of fuel composition and vehicle operating temperature on in vitro toxicity of exhaust emissions
Source: Royal Society of Chemistry journal article supplement (doi:10.1039/d3ea00136a), 2024-01-01
Supplement: d3ea00136a1.pdf [file d3ea00136a1.pdf]

## Supplementary materials S2

Table S2.1. Full results of the MMM analysis.

| Genotoxicity                            |          |            |       |       |         |                         |             |
|-----------------------------------------|----------|------------|-------|-------|---------|-------------------------|-------------|
| Estimates of Fixed Effects <sup>a</sup> |          |            |       |       |         |                         |             |
| Parameter                               | Estimate | Std. Error | df    | t     | P-value | 95% Confidence Interval |             |
|                                         |          |            |       |       |         | Lower Bound             | Upper Bound |
| Intercept                               | 154,43   | 37,82      | 0,99  | 4,08  | 0,15    | -332,04                 | 640,90      |
| PM                                      | 11,04    | 13,77      | 13,95 | 0,80  | 0,44    | -18,51                  | 40,58       |
| BC                                      | -17,23   | 23,43      | 11,46 | -0,74 | 0,48    | -68,54                  | 34,08       |

a. Dependent Variable: Comet\_C2.

| Estimates of Fixed Effects <sup>a</sup> |          |            |        |       |         |                         |             |
|-----------------------------------------|----------|------------|--------|-------|---------|-------------------------|-------------|
| Parameter                               | Estimate | Std. Error | df     | t     | P-value | 95% Confidence Interval |             |
|                                         |          |            |        |       |         | Lower Bound             | Upper Bound |
| Intercept                               | 120,52   | 9,12       | 174,00 | 13,22 | 0,00    | 102,53                  | 138,52      |
| PM                                      | 5,01     | 4,72       | 174,00 | 1,06  | 0,29    | -4,30                   | 14,33       |
| PN                                      | -0,02    | 0,04       | 174,00 | -0,62 | 0,54    | -0,09                   | 0,05        |

a. Dependent Variable: Comet\_C2.

| Estimates of Fixed Effects <sup>a</sup> |          |            |        |      |         |                         |             |
|-----------------------------------------|----------|------------|--------|------|---------|-------------------------|-------------|
| Parameter                               | Estimate | Std. Error | df     | t    | P-value | 95% Confidence Interval |             |
|                                         |          |            |        |      |         | Lower Bound             | Upper Bound |
| Intercept                               | 92,10    | 11,10      | 174,00 | 8,30 | 0,00    | 70,19                   | 114,00      |
| PM                                      | 2,72     | 0,98       | 174,00 | 2,78 | 0,01    | 0,79                    | 4,66        |
| NOx                                     | 0,16     | 0,04       | 174,00 | 4,02 | 0,00    | 0,08                    | 0,24        |

a. Dependent Variable: Comet\_C2.

| Estimates of Fixed Effects <sup>a</sup> |          |            |        |       |         |                         |             |
|-----------------------------------------|----------|------------|--------|-------|---------|-------------------------|-------------|
| Parameter                               | Estimate | Std. Error | df     | t     | P-value | 95% Confidence Interval |             |
|                                         |          |            |        |       |         | Lower Bound             | Upper Bound |
| Intercept                               | 114,00   | 8,59       | 174,00 | 13,27 | 0,00    | 97,04                   | 130,96      |
| PM                                      | 2,52     | 0,99       | 174,00 | 2,54  | 0,01    | 0,56                    | 4,47        |
| NO2                                     | 2,97     | 0,88       | 174,00 | 3,36  | 0,00    | 1,22                    | 4,71        |

a. Dependent Variable: Comet\_C2.

**Estimates of Fixed Effects<sup>a</sup>**

| Parameter | Estimate | Std. Error | df     | t    | P-value | 95% Confidence Interval |             |
|-----------|----------|------------|--------|------|---------|-------------------------|-------------|
|           |          |            |        |      |         | Lower Bound             | Upper Bound |
| Intercept | 93,45    | 10,87      | 174,00 | 8,60 | 0,00    | 72,00                   | 114,91      |
| PN        | 0,02     | 0,01       | 174,00 | 2,77 | 0,01    | 0,01                    | 0,04        |
| NOx       | 0,17     | 0,04       | 174,00 | 4,11 | 0,00    | 0,09                    | 0,25        |

a. Dependent Variable: Comet\_C2.

**Estimates of Fixed Effects<sup>a</sup>**

| Parameter | Estimate | Std. Error | df   | t     | P-value | 95% Confidence Interval |             |
|-----------|----------|------------|------|-------|---------|-------------------------|-------------|
|           |          |            |      |       |         | Lower Bound             | Upper Bound |
| Intercept | 133,15   | 14,66      | 1,27 | 9,08  | 0,04    | 18,59                   | 247,71      |
| PM        | 6,48     | 2,68       | 2,68 | 2,42  | 0,10    | -2,67                   | 15,64       |
| Org       | -29,08   | 16,48      | 3,36 | -1,76 | 0,17    | -78,49                  | 20,33       |

a. Dependent Variable: Comet\_C2.

**Estimates of Fixed Effects<sup>a</sup>**

| Parameter | Estimate | Std. Error | df     | t    | P-value | 95% Confidence Interval |             |
|-----------|----------|------------|--------|------|---------|-------------------------|-------------|
|           |          |            |        |      |         | Lower Bound             | Upper Bound |
| Intercept | 83,10    | 14,27      | 17,70  | 5,82 | 0,00    | 53,08                   | 113,12      |
| Org       | 15,20    | 6,78       | 55,54  | 2,24 | 0,03    | 1,62                    | 28,78       |
| NOx       | 0,18     | 0,04       | 132,58 | 4,25 | 0,00    | 0,10                    | 0,27        |

a. Dependent Variable: Comet\_C2.

**Estimates of Fixed Effects<sup>a</sup>**

| Parameter | Estimate | Std. Error | df    | t     | P-value | 95% Confidence Interval |             |
|-----------|----------|------------|-------|-------|---------|-------------------------|-------------|
|           |          |            |       |       |         | Lower Bound             | Upper Bound |
| Intercept | 162,20   | 41,83      | 1,54  | 3,88  | 0,09    | -80,26                  | 404,66      |
| Org       | -13,75   | 42,72      | 62,98 | -0,32 | 0,75    | -99,13                  | 71,63       |
| BC        | 5,83     | 13,14      | 62,07 | 0,44  | 0,66    | -20,44                  | 32,11       |

a. Dependent Variable: Comet\_C2.

**Estimates of Fixed Effects<sup>a</sup>**

| Parameter | Estimate | Std. Error | df     | t     | P-value | 95% Confidence Interval |             |
|-----------|----------|------------|--------|-------|---------|-------------------------|-------------|
|           |          |            |        |       |         | Lower Bound             | Upper Bound |
| Intercept | 131,29   | 10,63      | 174,00 | 12,35 | 0,00    | 110,30                  | 152,27      |
| Org       | -9,89    | 11,26      | 174,00 | -0,88 | 0,38    | -32,11                  | 12,32       |
| PN        | 0,02     | 0,01       | 174,00 | 1,84  | 0,07    | 0,00                    | 0,05        |

a. Dependent Variable: Comet\_C2.

**Estimates of Fixed Effects<sup>a</sup>**

| Parameter | Estimate | Std. Error | df    | t     | P-value | 95% Confidence Interval |             |
|-----------|----------|------------|-------|-------|---------|-------------------------|-------------|
|           |          |            |       |       |         | Lower Bound             | Upper Bound |
| Intercept | 138,95   | 90,99      | 0,45  | 1,53  | 0,53    | -28108,03               | 28385,92    |
| PM        | 7,55     | 15,65      | 61,00 | 0,48  | 0,63    | -23,74                  | 38,84       |
| BC        | -10,95   | 26,98      | 61,00 | -0,41 | 0,69    | -64,90                  | 43,00       |
| DPFreg    | 15,27    | 123,46     | 0,63  | 0,12  | 0,93    | -6631,11                | 6661,66     |

a. Dependent Variable: Comet\_C2.

**Estimates of Fixed Effects<sup>a</sup>**

| Parameter | Estimate | Std. Error | df     | t     | P-value | 95% Confidence Interval |             |
|-----------|----------|------------|--------|-------|---------|-------------------------|-------------|
|           |          |            |        |       |         | Lower Bound             | Upper Bound |
| Intercept | 115,74   | 8,98       | 173,00 | 12,89 | 0,00    | 98,02                   | 133,47      |
| PM        | 1,25     | 4,73       | 173,00 | 0,26  | 0,79    | -8,08                   | 10,57       |
| PN        | 0,01     | 0,04       | 173,00 | 0,26  | 0,79    | -0,06                   | 0,08        |
| DPFreg    | 93,81    | 28,25      | 173,00 | 3,32  | 0,00    | 38,05                   | 149,57      |

a. Dependent Variable: Comet\_C2.

**Estimates of Fixed Effects<sup>a</sup>**

| Parameter | Estimate | Std. Error | df     | t     | P-value | 95% Confidence Interval |             |
|-----------|----------|------------|--------|-------|---------|-------------------------|-------------|
|           |          |            |        |       |         | Lower Bound             | Upper Bound |
| Intercept | 80,23    | 17,36      | 173,00 | 4,62  | 0,00    | 45,96                   | 114,49      |
| PM        | 2,83     | 0,99       | 173,00 | 2,86  | 0,00    | 0,87                    | 4,78        |
| NOx       | 0,26     | 0,11       | 173,00 | 2,29  | 0,02    | 0,04                    | 0,48        |
| DPFreg    | -65,74   | 73,91      | 173,00 | -0,89 | 0,37    | -211,61                 | 80,13       |

a. Dependent Variable: Comet\_C2.

**Estimates of Fixed Effects<sup>a</sup>**

| Parameter | Estimate | Std. Error | df     | t     | P-value | 95% Confidence Interval |             |
|-----------|----------|------------|--------|-------|---------|-------------------------|-------------|
|           |          |            |        |       |         | Lower Bound             | Upper Bound |
| Intercept | 117,07   | 10,71      | 173,00 | 10,93 | 0,00    | 95,93                   | 138,21      |
| PM        | 2,34     | 1,06       | 173,00 | 2,21  | 0,03    | 0,25                    | 4,43        |
| NO2       | -5,82    | 18,21      | 173,00 | -0,32 | 0,75    | -41,76                  | 30,13       |
| DPFreg    | 270,67   | 560,71     | 173,00 | 0,48  | 0,63    | -836,03                 | 1377,38     |

a. Dependent Variable: Comet\_C2.

**Estimates of Fixed Effects<sup>a</sup>**

| Parameter | Estimate | Std. Error | df     | t     | P-value | 95% Confidence Interval |             |
|-----------|----------|------------|--------|-------|---------|-------------------------|-------------|
|           |          |            |        |       |         | Lower Bound             | Upper Bound |
| Intercept | 117,25   | 11,46      | 173,00 | 10,23 | 0,00    | 94,62                   | 139,88      |
| PM        | 3,01     | 2,12       | 173,00 | 1,42  | 0,16    | -1,18                   | 7,20        |
| Org       | -4,13    | 14,08      | 173,00 | -0,29 | 0,77    | -31,92                  | 23,66       |
| DPFreg    | 88,33    | 29,76      | 173,00 | 2,97  | 0,00    | 29,59                   | 147,08      |

a. Dependent Variable: Comet\_C2.

**Estimates of Fixed Effects<sup>a</sup>**

| Parameter | Estimate | Std. Error | df     | t     | P-value | 95% Confidence Interval |             |
|-----------|----------|------------|--------|-------|---------|-------------------------|-------------|
|           |          |            |        |       |         | Lower Bound             | Upper Bound |
| Intercept | 116,30   | 11,25      | 173,00 | 10,34 | 0,00    | 94,10                   | 138,50      |
| PN        | 0,02     | 0,01       | 173,00 | 1,39  | 0,17    | -0,01                   | 0,04        |
| Org       | 0,63     | 11,38      | 173,00 | 0,06  | 0,96    | -21,82                  | 23,09       |
| DPFreg    | 96,04    | 28,53      | 173,00 | 3,37  | 0,00    | 39,73                   | 152,34      |

a. Dependent Variable: Comet\_C2.

## CXCL1

### Estimates of Fixed Effects<sup>a</sup>

| Parameter | Estimate | Std. Error | df    | t     | P-value | 95% Confidence Interval |             |
|-----------|----------|------------|-------|-------|---------|-------------------------|-------------|
|           |          |            |       |       |         | Lower Bound             | Upper Bound |
| Intercept | 54,29    | 45,94      | 2,19  | 1,18  | 0,35    | -127,79                 | 236,38      |
| PM        | 26,24    | 8,94       | 70,77 | 2,94  | 0,00    | 8,42                    | 44,05       |
| BC        | -48,17   | 15,40      | 69,82 | -3,13 | 0,00    | -78,88                  | -17,46      |

a. Dependent Variable: CXCL1\_C2.

### Estimates of Fixed Effects<sup>a</sup>

| Parameter | Estimate | Std. Error | df     | t     | P-value | 95% Confidence Interval |             |
|-----------|----------|------------|--------|-------|---------|-------------------------|-------------|
|           |          |            |        |       |         | Lower Bound             | Upper Bound |
| Intercept | 95,12    | 8,74       | 4,39   | 10,89 | 0,00    | 71,68                   | 118,56      |
| PM        | 3,12     | 3,49       | 172,49 | 0,89  | 0,37    | -3,78                   | 10,01       |
| PN        | -0,03    | 0,03       | 106,69 | -1,14 | 0,26    | -0,09                   | 0,02        |

a. Dependent Variable: CXCL1\_C2.

### Estimates of Fixed Effects<sup>a</sup>

| Parameter | Estimate | Std. Error | df     | t     | P-value | 95% Confidence Interval |             |
|-----------|----------|------------|--------|-------|---------|-------------------------|-------------|
|           |          |            |        |       |         | Lower Bound             | Upper Bound |
| Intercept | 104,97   | 8,55       | 201,00 | 12,28 | 0,00    | 88,11                   | 121,82      |
| PM        | -0,54    | 0,72       | 201,00 | -0,75 | 0,46    | -1,95                   | 0,88        |
| NOx       | -0,05    | 0,03       | 201,00 | -1,57 | 0,12    | -0,12                   | 0,01        |

a. Dependent Variable: CXCL1\_C2.

### Estimates of Fixed Effects<sup>a</sup>

| Parameter | Estimate | Std. Error | df    | t     | P-value | 95% Confidence Interval |             |
|-----------|----------|------------|-------|-------|---------|-------------------------|-------------|
|           |          |            |       |       |         | Lower Bound             | Upper Bound |
| Intercept | 98,44    | 6,47       | 4,04  | 15,20 | 0,00    | 80,53                   | 116,34      |
| PM        | -0,50    | 0,72       | 11,21 | -0,69 | 0,50    | -2,08                   | 1,08        |
| NO2       | -1,06    | 0,71       | 90,51 | -1,50 | 0,14    | -2,47                   | 0,34        |

a. Dependent Variable: CXCL1\_C2.

**Estimates of Fixed Effects<sup>a</sup>**

| Parameter | Estimate | Std. Error | df     | t     | P-value | 95% Confidence Interval |             |
|-----------|----------|------------|--------|-------|---------|-------------------------|-------------|
|           |          |            |        |       |         | Lower Bound             | Upper Bound |
| Intercept | 105,61   | 8,81       | 10,74  | 11,99 | 0,00    | 86,17                   | 125,05      |
| PN        | -0,01    | 0,01       | 11,86  | -1,11 | 0,29    | -0,02                   | 0,01        |
| NOx       | -0,05    | 0,03       | 108,42 | -1,52 | 0,13    | -0,12                   | 0,02        |

a. Dependent Variable: CXCL1\_C2.

**Estimates of Fixed Effects<sup>a</sup>**

| Parameter | Estimate | Std. Error | df   | t     | P-value | 95% Confidence Interval |             |
|-----------|----------|------------|------|-------|---------|-------------------------|-------------|
|           |          |            |      |       |         | Lower Bound             | Upper Bound |
| Intercept | 87,76    | 10,19      | 3,67 | 8,61  | 0,00    | 58,44                   | 117,07      |
| PM        | -3,67    | 1,94       | 7,69 | -1,89 | 0,10    | -8,17                   | 0,83        |
| Org       | 19,83    | 12,02      | 9,85 | 1,65  | 0,13    | -7,01                   | 46,68       |

a. Dependent Variable: CXCL1\_C2.

**Estimates of Fixed Effects<sup>a</sup>**

| Parameter | Estimate | Std. Error | df     | t     | P-value | 95% Confidence Interval |             |
|-----------|----------|------------|--------|-------|---------|-------------------------|-------------|
|           |          |            |        |       |         | Lower Bound             | Upper Bound |
| Intercept | 103,22   | 10,32      | 201,00 | 10,01 | 0,00    | 82,88                   | 123,56      |
| Org       | -0,95    | 4,81       | 201,00 | -0,20 | 0,84    | -10,43                  | 8,53        |
| NOx       | -0,05    | 0,03       | 201,00 | -1,47 | 0,14    | -0,12                   | 0,02        |

a. Dependent Variable: CXCL1\_C2.

**Estimates of Fixed Effects<sup>a</sup>**

| Parameter | Estimate | Std. Error | df    | t     | P-value | 95% Confidence Interval |             |
|-----------|----------|------------|-------|-------|---------|-------------------------|-------------|
|           |          |            |       |       |         | Lower Bound             | Upper Bound |
| Intercept | 99,78    | 30,15      | 2,10  | 3,31  | 0,08    | -24,13                  | 223,70      |
| Org       | 78,93    | 22,41      | 73,47 | 3,52  | 0,00    | 34,28                   | 123,59      |
| BC        | -26,61   | 6,84       | 73,89 | -3,89 | 0,00    | -40,23                  | -12,99      |

a. Dependent Variable: CXCL1\_C2.

**Estimates of Fixed Effects<sup>a</sup>**

| Parameter | Estimate | Std. Error | df    | t     | P-value | 95% Confidence Interval |             |
|-----------|----------|------------|-------|-------|---------|-------------------------|-------------|
|           |          |            |       |       |         | Lower Bound             | Upper Bound |
| Intercept | 87,41    | 10,99      | 4,00  | 7,95  | 0,00    | 56,89                   | 117,92      |
| Org       | 16,53    | 10,01      | 17,89 | 1,65  | 0,12    | -4,51                   | 37,57       |
| PN        | -0,03    | 0,01       | 10,89 | -2,06 | 0,06    | -0,06                   | 0,00        |

a. Dependent Variable: CXCL1\_C2.

**Estimates of Fixed Effects<sup>a</sup>**

| Parameter | Estimate | Std. Error | df    | t     | P-value | 95% Confidence Interval |             |
|-----------|----------|------------|-------|-------|---------|-------------------------|-------------|
|           |          |            |       |       |         | Lower Bound             | Upper Bound |
| Intercept | 128,29   | 12,88      | 73,00 | 9,96  | 0,00    | 102,62                  | 153,97      |
| PM        | 29,20    | 9,15       | 73,00 | 3,19  | 0,00    | 10,97                   | 47,43       |
| BC        | -53,49   | 15,80      | 73,00 | -3,38 | 0,00    | -84,98                  | -22,00      |
| DPFreg    | -129,29  | 30,53      | 73,00 | -4,24 | 0,00    | -190,13                 | -68,45      |

a. Dependent Variable: CXCL1\_C2.

**Estimates of Fixed Effects<sup>a</sup>**

| Parameter | Estimate | Std. Error | df     | t     | P-value | 95% Confidence Interval |             |
|-----------|----------|------------|--------|-------|---------|-------------------------|-------------|
|           |          |            |        |       |         | Lower Bound             | Upper Bound |
| Intercept | 96,25    | 7,93       | 4,16   | 12,13 | 0,00    | 74,55                   | 117,95      |
| PM        | 4,18     | 3,55       | 159,29 | 1,18  | 0,24    | -2,84                   | 11,20       |
| PN        | -0,04    | 0,03       | 88,72  | -1,40 | 0,16    | -0,09                   | 0,02        |
| DPFreg    | -35,37   | 22,83      | 177,81 | -1,55 | 0,12    | -80,43                  | 9,68        |

a. Dependent Variable: CXCL1\_C2.

**Estimates of Fixed Effects<sup>a</sup>**

| Parameter | Estimate | Std. Error | df     | t     | P-value | 95% Confidence Interval |             |
|-----------|----------|------------|--------|-------|---------|-------------------------|-------------|
|           |          |            |        |       |         | Lower Bound             | Upper Bound |
| Intercept | 104,67   | 12,98      | 200,00 | 8,06  | 0,00    | 79,07                   | 130,27      |
| PM        | -0,53    | 0,73       | 200,00 | -0,73 | 0,46    | -1,96                   | 0,90        |
| NOx       | -0,05    | 0,08       | 200,00 | -0,60 | 0,55    | -0,21                   | 0,11        |

|        |       |       |        |       |      |         |        |
|--------|-------|-------|--------|-------|------|---------|--------|
| DPFreg | -1,68 | 54,87 | 200,00 | -0,03 | 0,98 | -109,88 | 106,51 |
|--------|-------|-------|--------|-------|------|---------|--------|

a. Dependent Variable: CXCL1\_C2.

**Estimates of Fixed Effects<sup>a</sup>**

| Parameter | Estimate | Std. Error | df     | t     | P-value | 95% Confidence Interval |             |
|-----------|----------|------------|--------|-------|---------|-------------------------|-------------|
|           |          |            |        |       |         | Lower Bound             | Upper Bound |
| Intercept | 103,91   | 8,06       | 200,00 | 12,89 | 0,00    | 88,02                   | 119,81      |
| PM        | -0,79    | 0,76       | 200,00 | -1,04 | 0,30    | -2,30                   | 0,71        |
| NO2       | -16,70   | 13,84      | 200,00 | -1,21 | 0,23    | -43,98                  | 10,59       |
| DPFreg    | 481,67   | 426,00     | 200,00 | 1,13  | 0,26    | -358,36                 | 1321,70     |

a. Dependent Variable: CXCL1\_C2.

**Estimates of Fixed Effects<sup>a</sup>**

| Parameter | Estimate | Std. Error | df    | t     | P-value | 95% Confidence Interval |             |
|-----------|----------|------------|-------|-------|---------|-------------------------|-------------|
|           |          |            |       |       |         | Lower Bound             | Upper Bound |
| Intercept | 90,55    | 10,30      | 3,22  | 8,79  | 0,00    | 59,02                   | 122,07      |
| PM        | -2,94    | 1,99       | 4,14  | -1,48 | 0,21    | -8,38                   | 2,50        |
| Org       | 15,55    | 12,65      | 5,89  | 1,23  | 0,27    | -15,55                  | 46,65       |
| DPFreg    | -15,03   | 24,41      | 77,79 | -0,62 | 0,54    | -63,62                  | 33,56       |

a. Dependent Variable: CXCL1\_C2.

**Estimates of Fixed Effects<sup>a</sup>**

| Parameter | Estimate | Std. Error | df     | t     | P-value | 95% Confidence Interval |             |
|-----------|----------|------------|--------|-------|---------|-------------------------|-------------|
|           |          |            |        |       |         | Lower Bound             | Upper Bound |
| Intercept | 90,55    | 10,62      | 3,89   | 8,53  | 0,00    | 60,74                   | 120,37      |
| PN        | -0,02    | 0,01       | 7,06   | -1,79 | 0,12    | -0,05                   | 0,01        |
| Org       | 13,38    | 9,97       | 13,13  | 1,34  | 0,20    | -8,14                   | 34,90       |
| DPFreg    | -19,99   | 23,05      | 169,54 | -0,87 | 0,39    | -65,49                  | 25,51       |

a. Dependent Variable: CXCL1\_C2.



**IL-6**

**Estimates of Fixed Effects<sup>a</sup>**

| Parameter | Estimate | Std. Error | df    | t     | P-value | 95% Confidence Interval |             |
|-----------|----------|------------|-------|-------|---------|-------------------------|-------------|
|           |          |            |       |       |         | Lower Bound             | Upper Bound |
| Intercept | 71,86    | 52,36      | 1,99  | 1,37  | 0,30    | -154,98                 | 298,70      |
| PM        | 34,61    | 11,81      | 62,02 | 2,93  | 0,00    | 11,00                   | 58,22       |
| BC        | -64,64   | 20,34      | 60,37 | -3,18 | 0,00    | -105,31                 | -23,96      |

a. Dependent Variable: IL6\_C2.

**Estimates of Fixed Effects<sup>a</sup>**

| Parameter | Estimate | Std. Error | df     | t     | P-value | 95% Confidence Interval |             |
|-----------|----------|------------|--------|-------|---------|-------------------------|-------------|
|           |          |            |        |       |         | Lower Bound             | Upper Bound |
| Intercept | 102,10   | 11,81      | 3,44   | 8,65  | 0,00    | 67,09                   | 137,10      |
| PM        | 4,87     | 4,28       | 165,55 | 1,14  | 0,26    | -3,58                   | 13,33       |
| PN        | -0,05    | 0,03       | 113,54 | -1,55 | 0,12    | -0,12                   | 0,01        |

a. Dependent Variable: IL6\_C2.

**Estimates of Fixed Effects<sup>a</sup>**

| Parameter | Estimate | Std. Error | df     | t     | P-value | 95% Confidence Interval |             |
|-----------|----------|------------|--------|-------|---------|-------------------------|-------------|
|           |          |            |        |       |         | Lower Bound             | Upper Bound |
| Intercept | 110,03   | 10,95      | 11,50  | 10,05 | 0,00    | 86,07                   | 134,00      |
| PM        | -1,15    | 0,87       | 15,50  | -1,33 | 0,20    | -2,99                   | 0,69        |
| NOx       | -0,03    | 0,04       | 110,12 | -0,72 | 0,47    | -0,11                   | 0,05        |

a. Dependent Variable: IL6\_C2.

**Estimates of Fixed Effects<sup>a</sup>**

| Parameter | Estimate | Std. Error | df     | t     | P-value | 95% Confidence Interval |             |
|-----------|----------|------------|--------|-------|---------|-------------------------|-------------|
|           |          |            |        |       |         | Lower Bound             | Upper Bound |
| Intercept | 104,97   | 9,20       | 4,00   | 11,40 | 0,00    | 79,42                   | 130,52      |
| PM        | -1,25    | 0,89       | 24,26  | -1,39 | 0,18    | -3,09                   | 0,60        |
| NO2       | 0,14     | 0,92       | 143,50 | 0,15  | 0,88    | -1,68                   | 1,96        |

a. Dependent Variable: IL6\_C2.

**Estimates of Fixed Effects<sup>a</sup>**

| Parameter | Estimate | Std. Error | df     | t     | P-value | 95% Confidence Interval |             |
|-----------|----------|------------|--------|-------|---------|-------------------------|-------------|
|           |          |            |        |       |         | Lower Bound             | Upper Bound |
| Intercept | 110,57   | 11,81      | 7,39   | 9,36  | 0,00    | 82,93                   | 138,21      |
| PN        | -0,01    | 0,01       | 20,57  | -1,82 | 0,08    | -0,03                   | 0,00        |
| NOx       | -0,03    | 0,04       | 146,96 | -0,71 | 0,48    | -0,11                   | 0,05        |

a. Dependent Variable: IL6\_C2.

**Estimates of Fixed Effects<sup>a</sup>**

| Parameter | Estimate | Std. Error | df   | t     | P-value | 95% Confidence Interval |             |
|-----------|----------|------------|------|-------|---------|-------------------------|-------------|
|           |          |            |      |       |         | Lower Bound             | Upper Bound |
| Intercept | 102,40   | 12,42      | 3,12 | 8,24  | 0,00    | 63,71                   | 141,08      |
| PM        | -2,43    | 2,40       | 6,61 | -1,01 | 0,35    | -8,19                   | 3,32        |
| Org       | 6,69     | 14,88      | 8,85 | 0,45  | 0,66    | -27,06                  | 40,45       |

a. Dependent Variable: IL6\_C2.

**Estimates of Fixed Effects<sup>a</sup>**

| Parameter | Estimate | Std. Error | df     | t     | P-value | 95% Confidence Interval |             |
|-----------|----------|------------|--------|-------|---------|-------------------------|-------------|
|           |          |            |        |       |         | Lower Bound             | Upper Bound |
| Intercept | 113,51   | 12,39      | 185,00 | 9,16  | 0,00    | 89,07                   | 137,95      |
| Org       | -6,16    | 5,50       | 185,00 | -1,12 | 0,26    | -17,00                  | 4,69        |
| NOx       | -0,04    | 0,04       | 185,00 | -0,94 | 0,35    | -0,12                   | 0,04        |

a. Dependent Variable: IL6\_C2.

**Estimates of Fixed Effects<sup>a</sup>**

| Parameter | Estimate | Std. Error | df    | t     | P-value | 95% Confidence Interval |             |
|-----------|----------|------------|-------|-------|---------|-------------------------|-------------|
|           |          |            |       |       |         | Lower Bound             | Upper Bound |
| Intercept | 133,59   | 27,60      | 1,64  | 4,84  | 0,06    | -14,47                  | 281,64      |
| Org       | 95,24    | 29,21      | 69,84 | 3,26  | 0,00    | 36,97                   | 153,51      |
| BC        | -33,26   | 8,83       | 69,88 | -3,76 | 0,00    | -50,88                  | -15,64      |

a. Dependent Variable: IL6\_C2.

**Estimates of Fixed Effects<sup>a</sup>**

| Parameter | Estimate | Std. Error | df    | t     | P-value | 95% Confidence Interval |             |
|-----------|----------|------------|-------|-------|---------|-------------------------|-------------|
|           |          |            |       |       |         | Lower Bound             | Upper Bound |
| Intercept | 98,03    | 14,99      | 3,22  | 6,54  | 0,01    | 52,13                   | 143,93      |
| Org       | 12,43    | 12,85      | 19,22 | 0,97  | 0,35    | -14,45                  | 39,30       |
| PN        | -0,03    | 0,02       | 12,19 | -1,81 | 0,09    | -0,07                   | 0,01        |

a. Dependent Variable: IL6\_C2.

**Estimates of Fixed Effects<sup>a</sup>**

| Parameter | Estimate | Std. Error | df    | t     | P-value | 95% Confidence Interval |             |
|-----------|----------|------------|-------|-------|---------|-------------------------|-------------|
|           |          |            |       |       |         | Lower Bound             | Upper Bound |
| Intercept | 152,87   | 16,48      | 69,00 | 9,28  | 0,00    | 119,99                  | 185,75      |
| PM        | 39,29    | 12,23      | 69,00 | 3,21  | 0,00    | 14,89                   | 63,68       |
| BC        | -72,99   | 21,12      | 69,00 | -3,46 | 0,00    | -115,11                 | -30,86      |
| DPFreg    | -138,60  | 40,82      | 69,00 | -3,40 | 0,00    | -220,04                 | -57,17      |

a. Dependent Variable: IL6\_C2.

**Estimates of Fixed Effects<sup>a</sup>**

| Parameter | Estimate | Std. Error | df     | t     | P-value | 95% Confidence Interval |             |
|-----------|----------|------------|--------|-------|---------|-------------------------|-------------|
|           |          |            |        |       |         | Lower Bound             | Upper Bound |
| Intercept | 102,13   | 11,90      | 3,45   | 8,58  | 0,00    | 66,90                   | 137,37      |
| PM        | 4,92     | 4,41       | 166,26 | 1,12  | 0,27    | -3,78                   | 13,62       |
| PN        | -0,05    | 0,04       | 118,97 | -1,52 | 0,13    | -0,12                   | 0,02        |
| DPFreg    | -1,12    | 29,13      | 180,90 | -0,04 | 0,97    | -58,59                  | 56,35       |

a. Dependent Variable: IL6\_C2.

**Estimates of Fixed Effects<sup>a</sup>**

| Parameter | Estimate | Std. Error | df     | t     | P-value | 95% Confidence Interval |             |
|-----------|----------|------------|--------|-------|---------|-------------------------|-------------|
|           |          |            |        |       |         | Lower Bound             | Upper Bound |
| Intercept | 130,31   | 15,65      | 39,77  | 8,33  | 0,00    | 98,68                   | 161,94      |
| PM        | -1,37    | 0,88       | 16,82  | -1,57 | 0,14    | -3,22                   | 0,47        |
| NOx       | -0,19    | 0,10       | 163,81 | -1,96 | 0,05    | -0,38                   | 0,00        |
| DPFreg    | 118,84   | 64,94      | 183,86 | 1,83  | 0,07    | -9,29                   | 246,96      |

a. Dependent Variable: IL6\_C2.

**Estimates of Fixed Effects<sup>a</sup>**

| Parameter | Estimate | Std. Error | df    | t     | P-value | 95% Confidence Interval |             |
|-----------|----------|------------|-------|-------|---------|-------------------------|-------------|
|           |          |            |       |       |         | Lower Bound             | Upper Bound |
| Intercept | 111,05   | 10,47      | 3,53  | 10,60 | 0,00    | 80,40                   | 141,71      |
| PM        | -1,33    | 0,91       | 20,13 | -1,47 | 0,16    | -3,22                   | 0,55        |
| NO2       | -19,05   | 18,79      | 1,41  | -1,01 | 0,45    | -142,60                 | 104,50      |
| DPFreg    | 587,24   | 577,00     | 1,50  | 1,02  | 0,45    | -2894,90                | 4069,39     |

a. Dependent Variable: IL6\_C2.

**Estimates of Fixed Effects<sup>a</sup>**

| Parameter | Estimate | Std. Error | df    | t     | P-value | 95% Confidence Interval |             |
|-----------|----------|------------|-------|-------|---------|-------------------------|-------------|
|           |          |            |       |       |         | Lower Bound             | Upper Bound |
| Intercept | 97,08    | 15,62      | 2,32  | 6,22  | 0,02    | 38,04                   | 156,11      |
| PM        | -3,99    | 2,94       | 4,25  | -1,36 | 0,24    | -11,96                  | 3,98        |
| Org       | 15,39    | 18,19      | 5,31  | 0,85  | 0,43    | -30,56                  | 61,34       |
| DPFreg    | 21,37    | 31,88      | 73,06 | 0,67  | 0,50    | -42,17                  | 84,91       |

a. Dependent Variable: IL6\_C2.

**Estimates of Fixed Effects<sup>a</sup>**

| Parameter | Estimate | Std. Error | df     | t     | P-value | 95% Confidence Interval |             |
|-----------|----------|------------|--------|-------|---------|-------------------------|-------------|
|           |          |            |        |       |         | Lower Bound             | Upper Bound |
| Intercept | 94,90    | 16,50      | 3,32   | 5,75  | 0,01    | 45,12                   | 144,67      |
| PN        | -0,04    | 0,02       | 13,38  | -1,97 | 0,07    | -0,07                   | 0,00        |
| Org       | 15,68    | 13,63      | 20,63  | 1,15  | 0,26    | -12,70                  | 44,07       |
| DPFreg    | 16,24    | 29,47      | 174,18 | 0,55  | 0,58    | -41,93                  | 74,41       |

a. Dependent Variable: IL6\_C2.
